# Supplementary material for: Metallomics and NMR-based metabolomics of Chlorella sp. reveal the synergistic role of copper and cadmium in multi-metal toxicity and oxidative stress
Source: Royal Society of Chemistry journal article supplement (doi:10.1039/c4mt00253a), 2014-12-10
Supplement: c4mt00253a1.pdf [file c4mt00253a1.pdf]

## Supplementary Information

**Table S1.** Instrument operating conditions (A) Agilent ICP-MS; (B) Agilent LC-QQQ.

A

ICP Parameters

Nebulizer Type

MicroMist

Isotopes Monitored

<sup>23</sup>Na, <sup>24</sup>Mg, <sup>39</sup>K, <sup>55</sup>Mn, <sup>56</sup>Fe, <sup>59</sup>Co, <sup>63</sup>Cu, <sup>66</sup>Zn, <sup>113</sup>Cd, <sup>208</sup>Pb, <sup>72</sup>Ge, <sup>103</sup>Rh, <sup>191</sup>Ir

Forward Power

1500 W

Plasma Gas Flow

14.97 L/min

Auxilliary Gas Flow

0.90 L/min

Carrier Gas Flow

1.07 L/min

B

UPLC Parameters

Colum

Zorbax Plus C18 (100 x 4.5mm, 3.5 μm)

Column Temperature

40 °C

Mobile Phase

Ultrapure water with 0.1% formic acid (A), Methanol with 0.1% formic acid (B)

Flow Rate

0.5 mL/min

Injection Volume

10 μL

Elution Gradient

Initial equilibration at 2% B for 3 min, followed by step gradient from 2-20% and 20-70% B at 2 min each. Flush with 70% B for 2 min, before re-equilibrating to initial column condition for 3 min. (Total run time is 12 min)

QQQ Parameter

Ion source

Agilent Jetstream electrospray ionization (ESI)

Ionization Mode

Positive

iFunnel

160 V (High Pressure), 100 V (Low Pressure)

Gas Temperature

Gas Flow Rate

260 °C

15 L/min

Sheath Gas Temperature

Sheath Gas Flow Rate

300 °C

11 L/min

Nebulizer

45 psi

**Table S2.** Source parameters for analysis of thiol peptide standards on Agilent LC-QQQ.

|                             | Precursor Ion (Da) | Qual. Product Ion (Da) | Quan. Product Ion (Da) | Collision Energy (eV) |
|-----------------------------|--------------------|------------------------|------------------------|-----------------------|
| Reduced Glutathione (GSH)   | 308.1              | 162.0                  | 233.0                  | 12                    |
| Oxidized Glutathione (GSSG) | 613.2              | 355.2                  | 484.1                  | 22                    |
| Phytochelatin2 (PC2)        | 540.3              | 232.9                  | 336.0                  | 20                    |
| Phytochelatin3 (PC3)        | 772.3              | 232.8                  | 465.1                  | 10                    |
| Phytochelatin4 (PC4)        | 1004.4             | 464.6                  | 540.0                  | 42                    |
| Phytochelatin5 (PC5)        | 1236.5             | 697.2                  | 771.9                  | 53                    |
| N-acetylcysteine (NAC)      | 164.2              | 75.9                   | 59.0                   | 11                    |

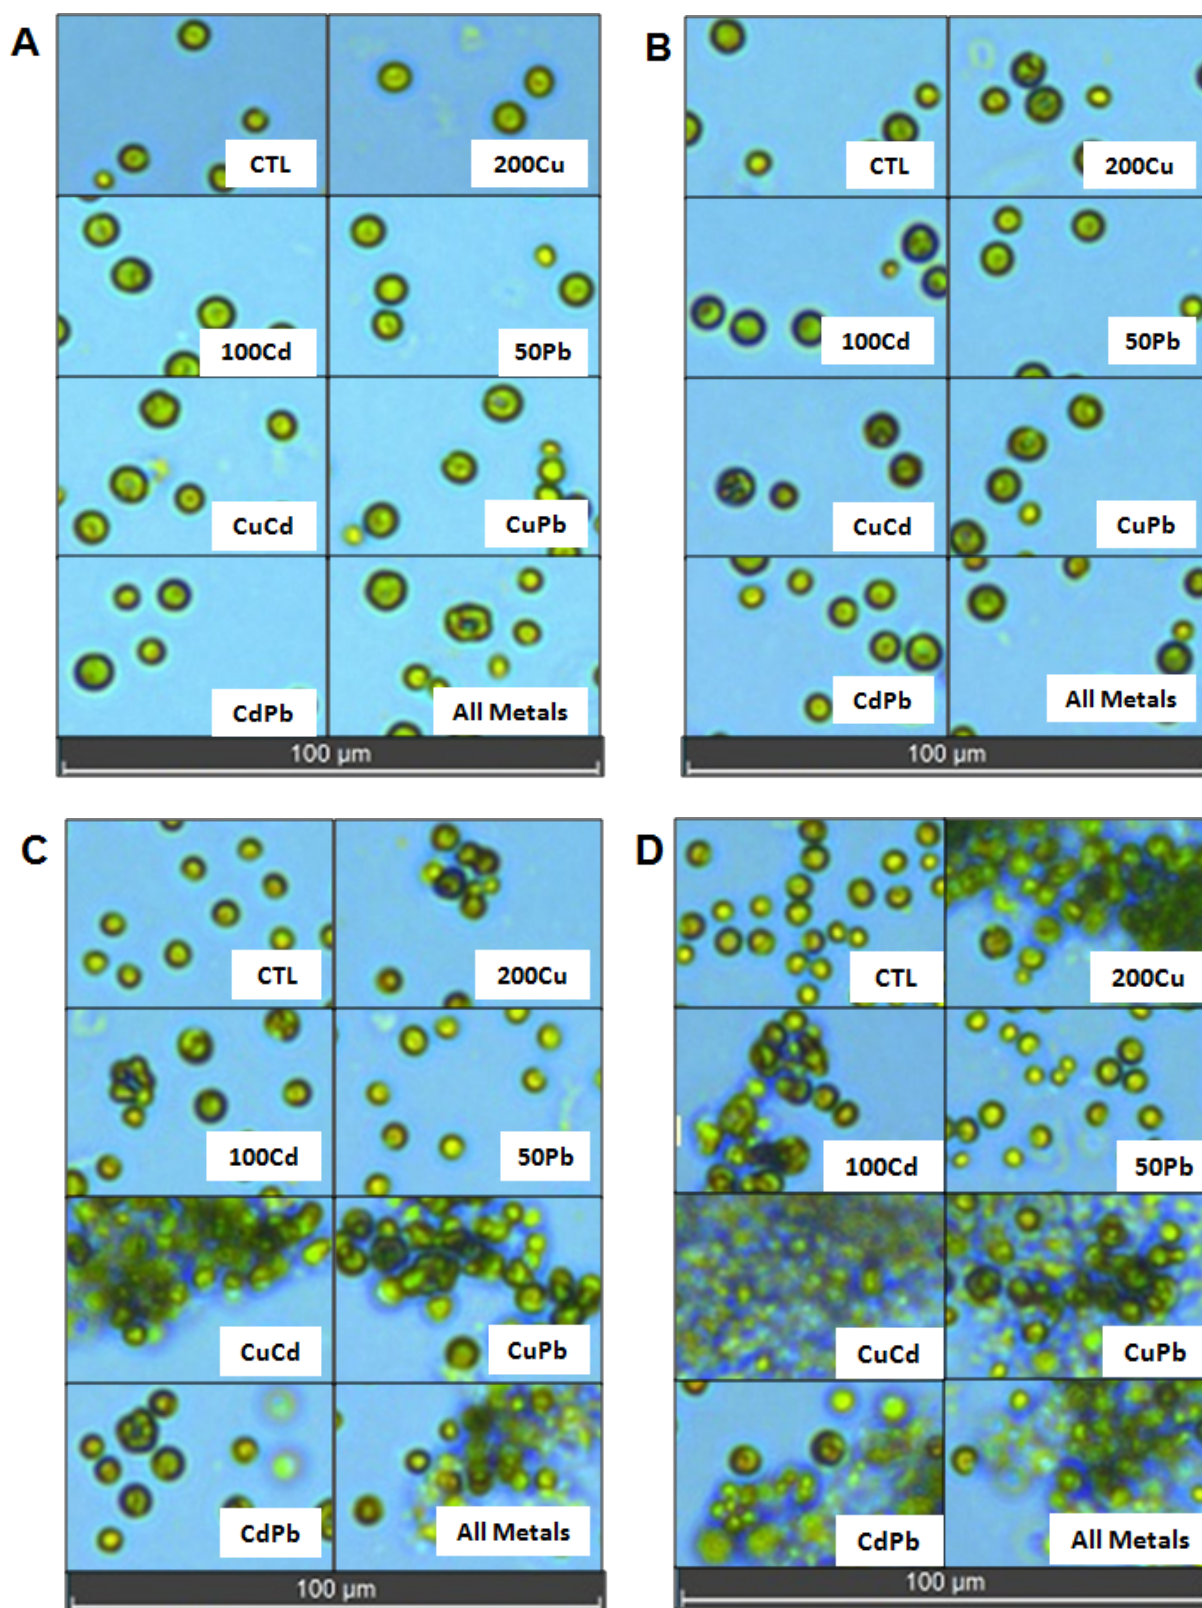

**Figure S1.** Optical micrographs of *Chlorella sp.* cells treated with various metal combinations at different exposure durations. Magnification at 40 x. A) 0h; B) 24h; C) 1 week; D) 2 weeks.

**A**

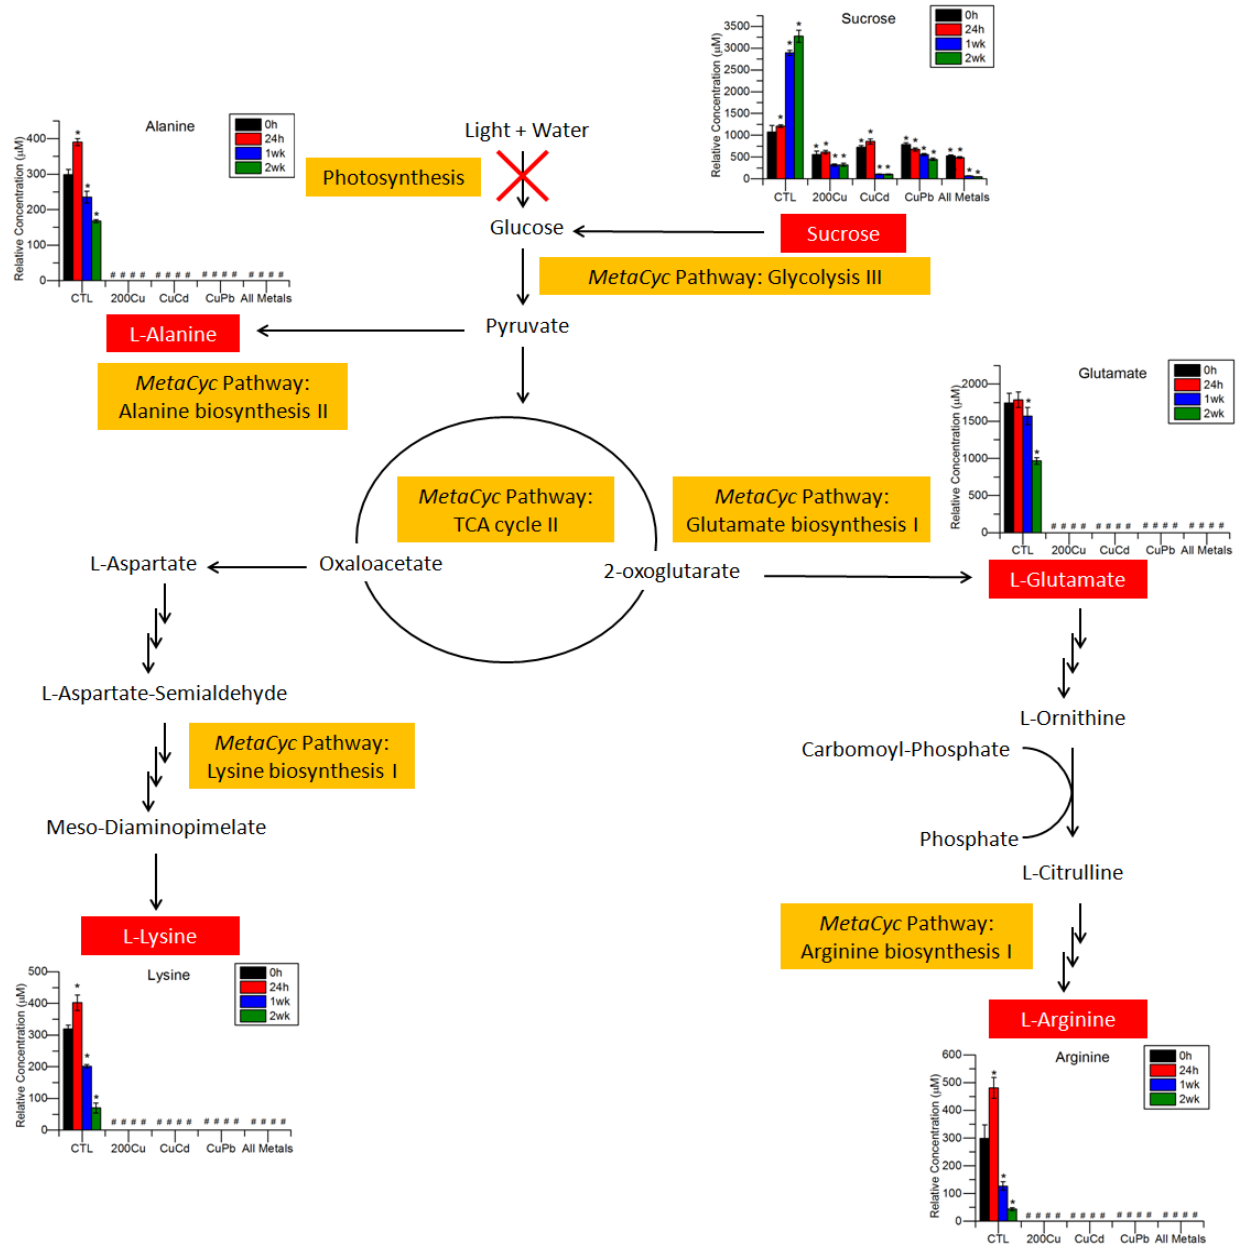

**B**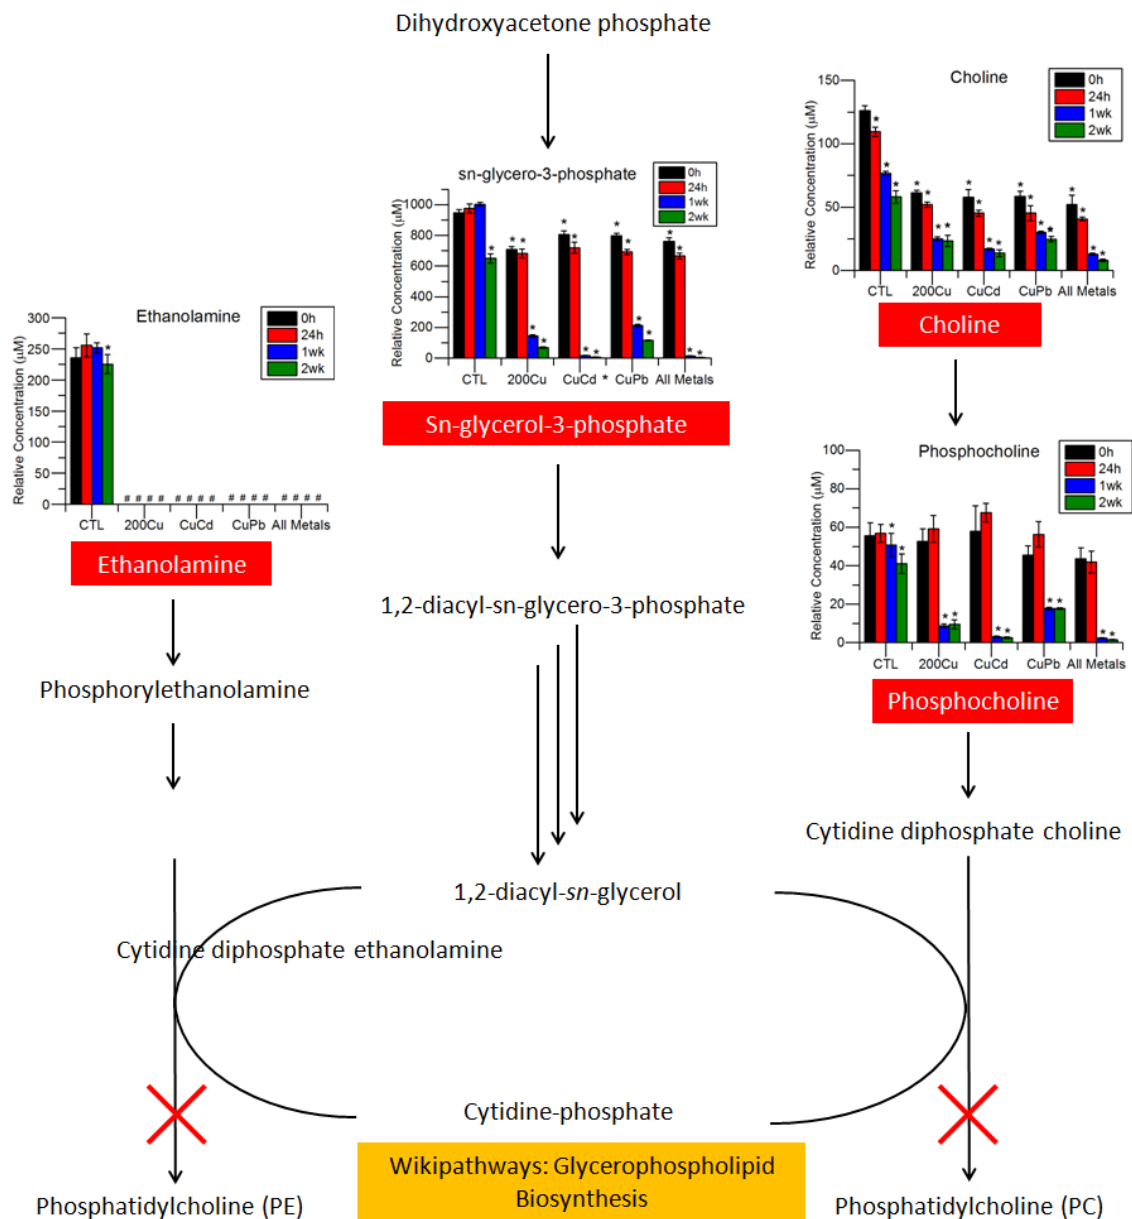

**Figure S2.** Proposed metabolic changes in *Chlorella sp.* acutely and chronically exposed to Cu. (A) Photosynthesis impairment arise from Cu-induced stress impacts carbohydrate metabolism and amino acid biosynthesis. (B) Cu-induced oxidative stress affects phospholipids biosynthesis. Key metabolic pathways are highlighted in orange, and key metabolites that decrease significantly ( $p < 0.001$ ) upon exposure to Cu are highlighted in red. #Absence of metabolites in *Chlorella sp.*

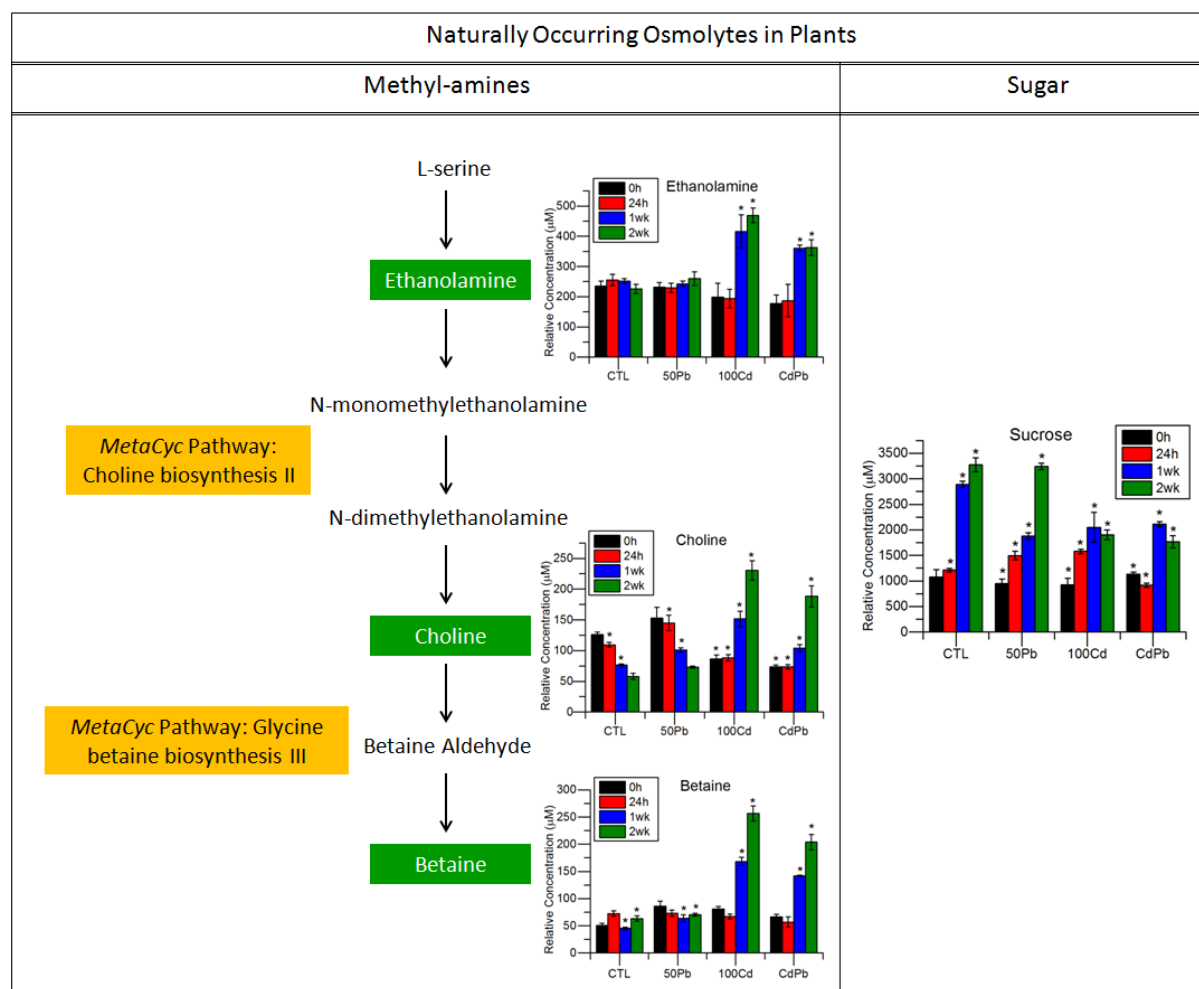

**Fi**

**figure S3.** Accumulation of naturally occurring osmolytes in *Chlorella sp.* after prolong Cd exposure. Key metabolic pathways are highlighted in orange, and key metabolites that increase significantly ( $p < 0.001$ ) over time are highlighted in green.
